# Supplementary material
Source: ML conference proceedings conference paper supplement (https://proceedings.mlr.press/v119/nguyen20b.html)
Supplement: Supplementary file [file nguyen20b-supp.pdf]

---

# LEEP: A New Measure to Evaluate Transferability of Learned Representations

## — Supplementary Material —

---

Cuong V. Nguyen<sup>1</sup> Tal Hassner<sup>2</sup> Matthias Seeger<sup>1</sup> Cedric Archambeau<sup>1</sup>

We present proofs of theoretical claims and the full experimental results discussed in the main paper.

### 1. Proofs

#### 1.1. Proof of Property 1

This proof is straight-forward because  $l(w, k^*)$  is the maximal average log-likelihood over  $k \in \mathcal{K}$ ,  $T(\theta, \mathcal{D})$  is the average log-likelihood of the EEP, and the EEP is in  $\mathcal{K}$ . Thus,  $T(\theta, \mathcal{D}) \leq l(w, k^*)$ .

#### 1.2. Proof of Property 2

Let  $Z = (z_1, z_2, \dots, z_n)$  be the dummy labels of  $(x_1, x_2, \dots, x_n)$  obtained when computing the NCE, and let  $Y = (y_1, y_2, \dots, y_n)$  be the true label set. We have:

$$\begin{aligned} T(\theta, \mathcal{D}) &= \frac{1}{n} \sum_{i=1}^n \log \left( \sum_{z \in \mathcal{Z}} \hat{P}(y_i|z) \theta(x_i)_z \right) \\ &\quad \text{(by definition)} \\ &\geq \frac{1}{n} \sum_{i=1}^n \log \left( \hat{P}(y_i|z_i) \theta(x_i)_{z_i} \right) \\ &\quad \text{(monotonicity of log)} \\ &= \frac{1}{n} \sum_{i=1}^n \log \hat{P}(y_i|z_i) + \frac{1}{n} \sum_{i=1}^n \log \theta(x_i)_{z_i}. \end{aligned}$$

According to the proof of Theorem 1 of Tran et al. (2019), we have:

$$\text{NCE}(Y|Z) = \frac{1}{n} \sum_{i=1}^n \log \hat{P}(y_i|z_i).$$

Thus, we have:

$$T(\theta, \mathcal{D}) \geq \text{NCE}(Y|Z) + \frac{1}{n} \sum_{i=1}^n \log \theta(x_i)_{z_i}.$$

---

<sup>1</sup>Amazon Web Services <sup>2</sup>Facebook AI (Work done before joining Facebook). Correspondence to: Cuong V. Nguyen <nguy-cuo@amazon.com>.

### 2. Full Experimental Results

Fig. 1 shows the results for all experimental settings with small balanced target data sets.

Fig. 2 shows the results for all experimental settings with small imbalanced target data sets.

Fig. 3 shows the results for all experimental settings with the convergence speed of fine-tuned models. For a clearer comparison, we only consider two LEEP transferability levels for target tasks constructed from FashionMNIST.

Fig. 4 shows the results for all experimental settings in the source model selection problem.

### References

- Bao, Y., Li, Y., Huang, S.-L., Zhang, L., Zheng, L., Zamir, A., and Guibas, L. An information-theoretic approach to transferability in task transfer learning. In *IEEE International Conference on Image Processing*, pp. 2309–2313, 2019.
- Kornblith, S., Shlens, J., and Le, Q. V. Do better imagenet models transfer better? In *IEEE Conference on Computer Vision and Pattern Recognition*, pp. 2661–2671, 2019.
- Tran, A. T., Nguyen, C. V., and Hassner, T. Transferability and hardness of supervised classification tasks. In *International Conference on Computer Vision*, pp. 1395–1405, 2019.

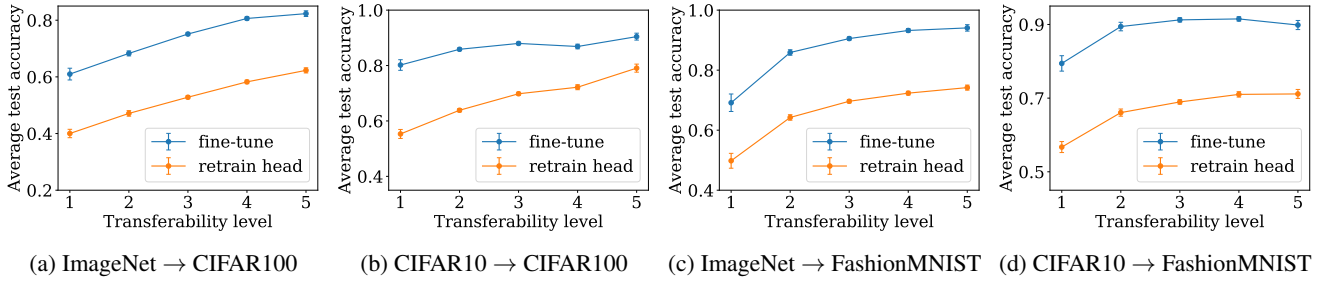

Figure 1. Average test accuracy of transferred models on small, balanced target data sets in five transferability levels obtained from LEEP scores. The higher the level, the easier the transfer. A → B in the subcaptions indicate that the source model is trained on A and the target datasets are constructed from B. The source models are ResNet18 for ImageNet (a,c) and ResNet20 for CIFAR10 (b,d).

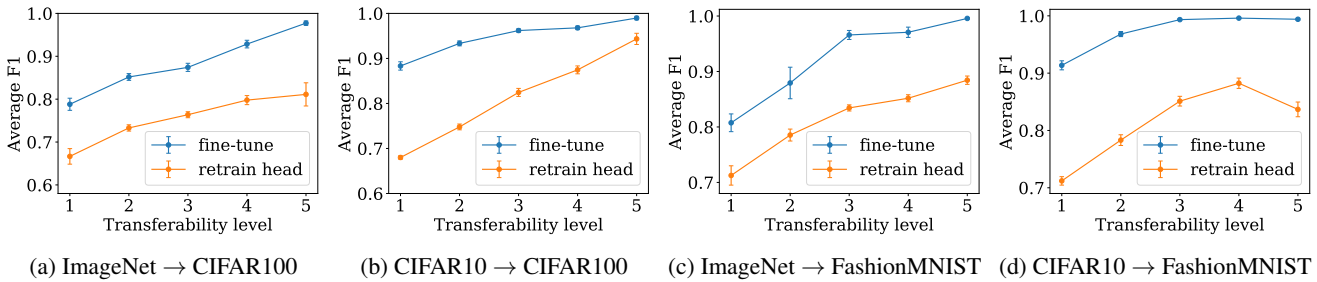

Figure 2. Average test F1 score of transferred models on small, imbalanced target data sets in five transferability levels obtained from LEEP scores. The higher the level, the easier the transfer. A → B in the subcaptions indicate that the source model is trained on A and the target datasets are constructed from B. The source models are ResNet18 for ImageNet (a,c) and ResNet20 for CIFAR10 (b,d).

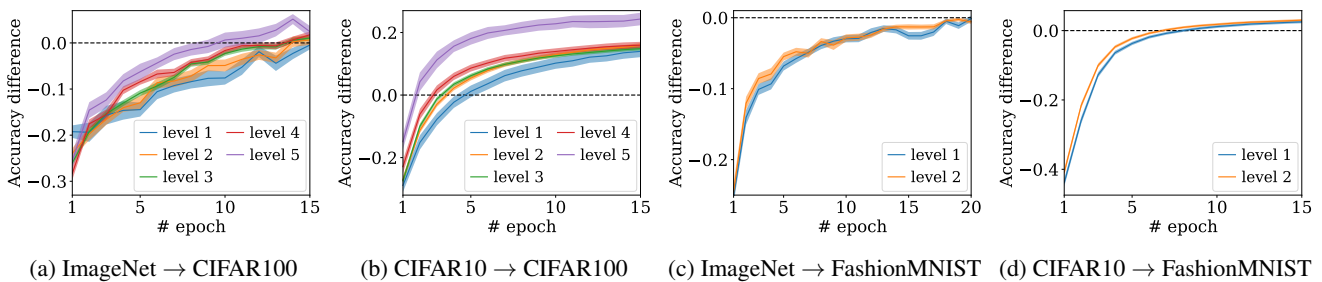

Figure 3. Convergence of accuracy for fine-tuned models to the accuracy of a reference model trained from scratch using only the target dataset. The convergence is represented by the accuracy difference between the fine-tune model and the reference model. Each curve is the average of the accuracy difference curves over tasks within the same transferability level. The zero lines indicate where the fine-tuned models match the accuracy of the reference model.

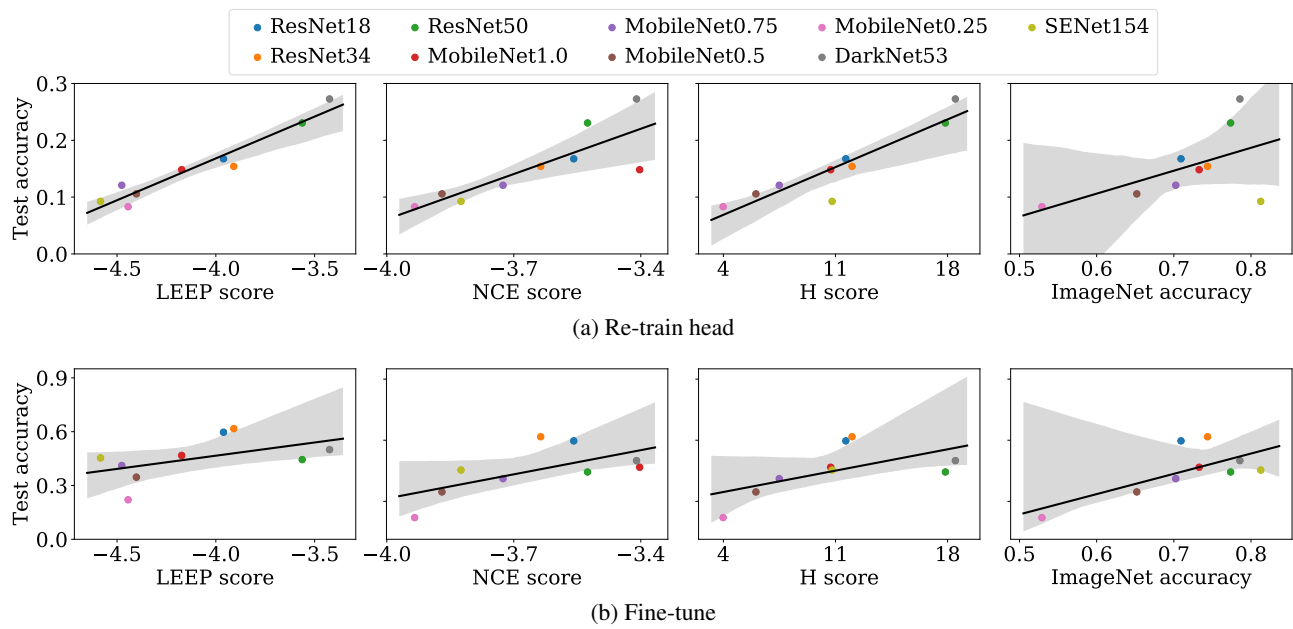

Figure 4. **Test accuracy vs. transferability** according to LEEP score (Tran et al., 2019), H score (Bao et al., 2019), and ImageNet accuracy (Kornblith et al., 2019) for 9 candidate source models (see the legend) pre-trained on ImageNet. The transferred models are obtained by (a) re-training the head classifier, and (b) fine-tuning the source model.
